# Supplementary material
Source: publisher site journal article supplement (https://www.dovepress.com/article/369584)
Supplement: Supplementary file 1 [file get_supplementary_file.php]

## PRISMA 2020 flow diagram for new systematic reviews which included searches of databases and registers only<sup>1</sup>

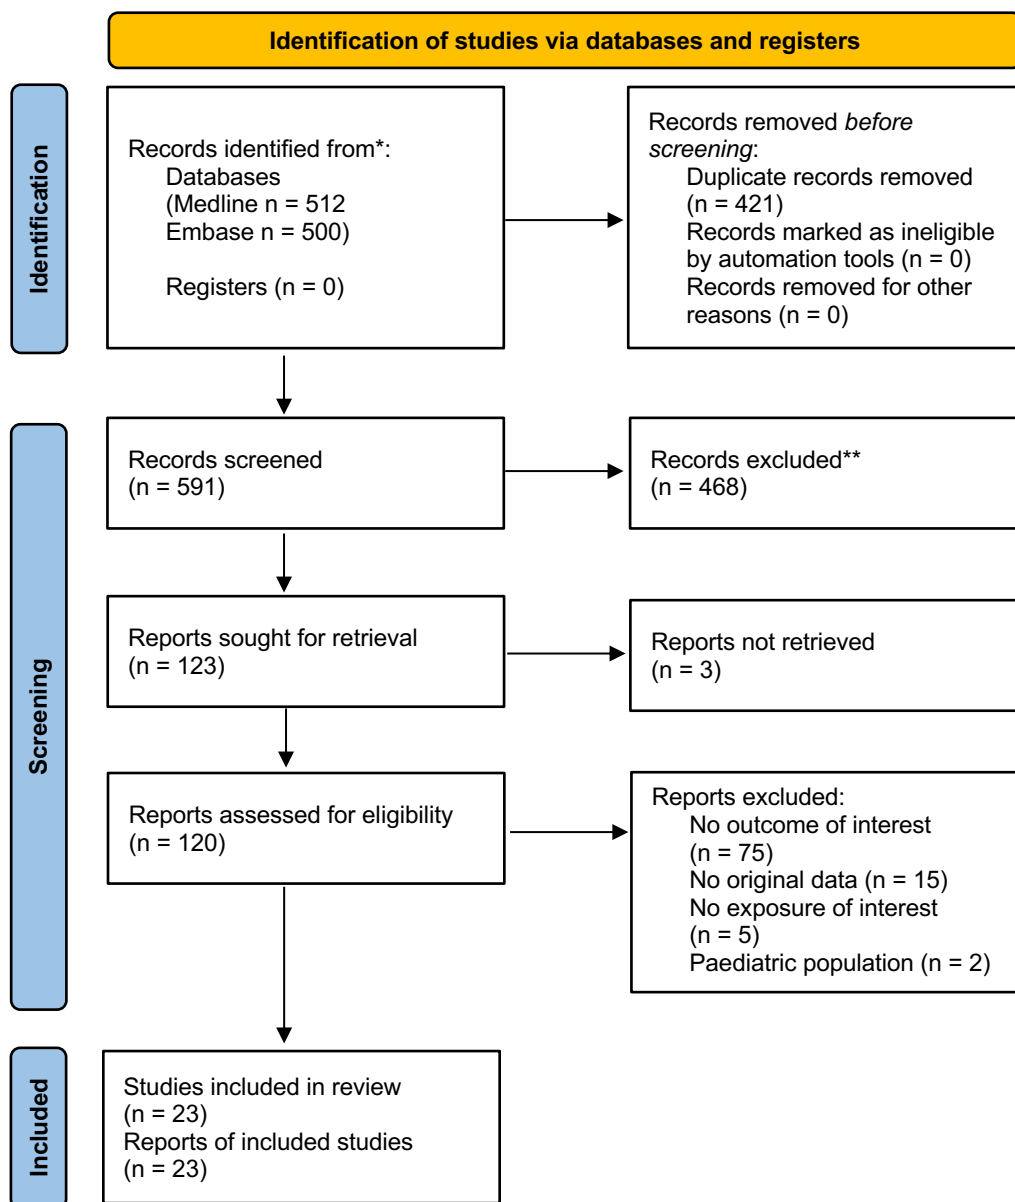

\*Consider, if feasible to do so, reporting the number of records identified from each database or register searched (rather than the total number across all databases/registers).

\*\*If automation tools were used, indicate how many records were excluded by a human and how many were excluded by automation tools.

From: Page MJ, McKenzie JE, Bossuyt PM, Boutron I, Hoffmann TC, Mulrow CD, et al. The PRISMA 2020 statement: an updated guideline for reporting systematic reviews. *BMJ* 2021;372:n71. doi: 10.1136/bmj.n71

For more information, visit: <http://www.prisma-statement.org/>

1. Different templates are available depending on the type of review (new or updated) and sources used to identify studies. For more information visit: <http://prisma-statement.org/prismastatement/flowdiagram.aspx>

## 1. Medline

Interface: Ovid MEDLINE(R) and Epub Ahead of Print, In-Process & Other Non-Indexed Citations and Daily

Date of Search: 9 September 2022

Number of hits: 512

Comment: In Ovid, two or more words are automatically searched as phrases; i.e. no quotation marks are needed

### Field labels

- exp/ = exploded MeSH term
- / = non exploded MeSH term
- .ti,ab,kf. = title, abstract and author keywords
- adjx = within x words, regardless of order
- \* = truncation of word for alternate endings

Database(s): **Ovid MEDLINE(R) and Epub Ahead of Print, In-Process, In-Data-Review & Other Non-Indexed Citations and Daily** 1946 to September 08, 2022

Search Strategy:

| #  | Searches                                                                                              | Results |
|----|-------------------------------------------------------------------------------------------------------|---------|
| 1  | exp Lupus Erythematosus, Systemic/                                                                    | 65187   |
| 2  | (lupus or sle).ti,ab,kf.                                                                              | 91394   |
| 3  | 1 or 2                                                                                                | 99852   |
| 4  | (belimumab or benlysta or gsk 1550188 or gsk1550188 or hgs 1006 or hgs1006 or lymphostat b).ti,ab,kf. | 832     |
| 5  | 3 and 4                                                                                               | 691     |
| 6  | exp animals/ not humans.sh.                                                                           | 5043578 |
| 7  | 5 not 6                                                                                               | 689     |
| 8  | limit 7 to (english or spanish)                                                                       | 652     |
| 9  | (review not journal article).pt.                                                                      | 58662   |
| 10 | (review or meta-analy*).ti.                                                                           | 703836  |
| 11 | 9 or 10                                                                                               | 758943  |
| 12 | 8 and 11                                                                                              | 72      |
| 13 | 8 not 12                                                                                              | 580     |
| 14 | (case reports not journal article).pt.                                                                | 433958  |
| 15 | case report.ti.                                                                                       | 287112  |
| 16 | 14 or 15                                                                                              | 663005  |
| 17 | 13 not 16                                                                                             | 556     |
| 18 | limit 17 to dt=19460101-20220309                                                                      | 512     |

## 2. Embase

|                                                        |  |                                                                                                                                                                                                                                                                                                  |
|--------------------------------------------------------|--|--------------------------------------------------------------------------------------------------------------------------------------------------------------------------------------------------------------------------------------------------------------------------------------------------|
| Interface: embase.com                                  |  | Field labels <ul style="list-style-type: none"><li>/exp = exploded Emtree term</li><li>/de = non exploded Emtree term</li><li>ti,ab,kw = title, abstract and author keywords</li><li>NEAR/x = within x words, regardless of order</li><li>* = truncation of word for alternate endings</li></ul> |
| Date of Search: 9 September 2022                       |  |                                                                                                                                                                                                                                                                                                  |
| Number of hits: 500                                    |  |                                                                                                                                                                                                                                                                                                  |
| Comment: Emtree is the controlled vocabulary in Embase |  |                                                                                                                                                                                                                                                                                                  |

| #   | Searches                                                                                                                                                               | Results |
|-----|------------------------------------------------------------------------------------------------------------------------------------------------------------------------|---------|
| #14 | #11 NOT #12 AND [01-01-1946]/sd NOT [10-03-2022]/sd                                                                                                                    | 500     |
| #13 | #11 NOT #12                                                                                                                                                            | 551     |
| #12 | #11 AND ('case report'/de OR 'case report':ti)                                                                                                                         | 61      |
| #11 | #8 NOT #10                                                                                                                                                             | 612     |
| #10 | #8 AND #9                                                                                                                                                              | 66      |
| #9  | review:ti OR 'meta analy*':ti OR metaanaly*:ti                                                                                                                         | 834276  |
| #8  | #6 NOT #7                                                                                                                                                              | 678     |
| #7  | #6 AND ([conference abstract]/lim OR [conference paper]/lim OR [conference review]/lim)                                                                                | 588     |
| #6  | #5 AND [humans]/lim AND ([english]/lim OR [spanish]/lim)                                                                                                               | 1266    |
| #5  | #3 AND #4                                                                                                                                                              | 1433    |
| #4  | 'belimumab':ti,ab,kw OR 'benlysta':ti,ab,kw OR 'gsk 1550188':ti,ab,kw OR 'gsk1550188':ti,ab,kw OR 'hgs 1006':ti,ab,kw OR 'hgs1006':ti,ab,kw OR 'lymphostat b':ti,ab,kw | 1666    |
| #3  | #1 OR #2                                                                                                                                                               | 159339  |
| #2  | lupus:ti,ab,kw OR sle:ti,ab,kw                                                                                                                                         | 135598  |
| #1  | 'systemic lupus erythematosus'/exp OR 'systemic lupus erythematosus'                                                                                                   | 12181   |
